# Supplementary material for: Rapid SARS-CoV-2 antigen detection assay in comparison with real-time RT-PCR assay for laboratory diagnosis of COVID-19 in Thailand
Source: Virol J. 2020 Nov 13;17:177. doi: 10.1186/s12985-020-01452-5 (PMC7665091; doi:10.1186/s12985-020-01452-5)
Supplement: Supplementary file 2 — Additional file 2. Table S2: Rapid antigen test in 394 SARS-CoV-2 RT-PCR-negative cases. Characteristics of each SARS-CoV-2 RT-PCR-negative case (n=394) including gender, initial diagnosis, specimen type, Ct-value of RT-PCR (E, RdRp, N), RT-PCR result, Standard Q COVID-19 Ag test result, and time from symptom onset to laboratory test are demonstrated. Continuous data were presented in mean, standard deviation (SD), median, and range (min, max). [file 12985_2020_1452_MOESM2_ESM.xlsx]

## Sheet: 2-Rapid Ag in 394 COVID-19 PCR-
Supplementary table 2 Rapid antigen test in 394 SARS-CoV-2 RT-PCR-negative cases
RT-PCR-negative cases no.	Gender	Age	Specimen type	RT-PCR result	Standard Q COVID-19 Ag test result
1	M	88	NP swab+throat swab	Not detected	Negative
2	M	89	NP swab+throat swab	Not detected	Negative
3	M	44	NP swab+throat swab	Not detected	Negative
4	F	67	NP swab+throat swab	Not detected	Positive
5	F	59	NP swab+throat swab	Not detected	Negative
6	F	27	NP swab+throat swab	Not detected	Negative
7	F	44	NP swab+throat swab	Not detected	Negative
8	M	60	NP swab+throat swab	Not detected	Negative
9	M	53	NP swab+throat swab	Not detected	Negative
10	M	56	NP swab+throat swab	Not detected	Negative
11	F	58	NP swab+throat swab	Not detected	Negative
12	M	61	NP swab+throat swab	Not detected	Negative
13	M	54	NP swab+throat swab	Not detected	Negative
14	F	64	NP swab+throat swab	Not detected	Negative
15	F	68	NP swab+throat swab	Not detected	Negative
16	F	72	NP swab+throat swab	Not detected	Negative
17	M	41	NP swab+throat swab	Not detected	Negative
18	F	78	NP swab+throat swab	Not detected	Negative
19	F	78	NP swab+throat swab	Not detected	Negative
20	M	62	NP swab+throat swab	Not detected	Negative
21	F	69	NP swab+throat swab	Not detected	Negative
22	F	59	NP swab+throat swab	Not detected	Negative
23	M	75	NP swab+throat swab	Not detected	Negative
24	F	50	NP swab+throat swab	Not detected	Negative
25	F	58	NP swab+throat swab	Not detected	Negative
26	M	46	NP swab+throat swab	Not detected	Negative
27	M	75	NP swab+throat swab	Not detected	Positive
28	F	62	NP swab+throat swab	Not detected	Negative
29	M	63	NP swab+throat swab	Not detected	Negative
30	M	83	NP swab+throat swab	Not detected	Negative
31	M	51	NP swab+throat swab	Not detected	Negative
32	F	68	NP swab+throat swab	Not detected	Negative
33	F	68	NP swab+throat swab	Not detected	Negative
34	F	63	NP swab+throat swab	Not detected	Negative
35	M	55	NP swab+throat swab	Not detected	Negative
36	M	69	NP swab+throat swab	Not detected	Negative
37	F	63	NP swab+throat swab	Not detected	Negative
38	F	76	NP swab+throat swab	Not detected	Negative
39	M	63	NP swab+throat swab	Not detected	Negative
40	F	40	NP swab+throat swab	Not detected	Negative
41	F	63	NP swab+throat swab	Not detected	Negative
42	F	56	NP swab+throat swab	Not detected	Negative
43	F	33	NP swab+throat swab	Not detected	Negative
44	M	28	NP swab+throat swab	Not detected	Negative
45	M	37	NP swab+throat swab	Not detected	Negative
46	F	55	NP swab+throat swab	Not detected	Negative
47	M	65	NP swab+throat swab	Not detected	Negative
48	F	58	NP swab+throat swab	Not detected	Negative
49	F	72	NP swab+throat swab	Not detected	Negative
50	M	84	NP swab+throat swab	Not detected	Negative
51	F	52	NP swab+throat swab	Not detected	Negative
52	F	52	NP swab+throat swab	Not detected	Negative
53	M	57	NP swab+throat swab	Not detected	Negative
54	F	93	NP swab+throat swab	Not detected	Negative
55	F	55	NP swab+throat swab	Not detected	Negative
56	F	57	NP swab+throat swab	Not detected	Negative
57	F	75	NP swab+throat swab	Not detected	Negative
58	F	50	NP swab+throat swab	Not detected	Negative
59	F	72	NP swab+throat swab	Not detected	Negative
60	F	54	NP swab+throat swab	Not detected	Negative
61	F	45	NP swab+throat swab	Not detected	Negative
62	F	55	NP swab+throat swab	Not detected	Negative
63	F	49	NP swab+throat swab	Not detected	Negative
64	M	56	NP swab+throat swab	Not detected	Negative
65	M	46	NP swab+throat swab	Not detected	Negative
66	F	65	NP swab+throat swab	Not detected	Negative
67	F	34	NP swab+throat swab	Not detected	Negative
68	F	62	NP swab+throat swab	Not detected	Negative
69	F	23	NP swab+throat swab	Not detected	Negative
70	M	64	NP swab+throat swab	Not detected	Negative
71	F	69	NP swab+throat swab	Not detected	Negative
72	M	55	NP swab+throat swab	Not detected	Negative
73	F	34	NP swab+throat swab	Not detected	Negative
74	M	28	NP swab+throat swab	Not detected	Negative
75	M	62	NP swab+throat swab	Not detected	Negative
76	M	74	NP swab+throat swab	Not detected	Negative
77	F	55	NP swab+throat swab	Not detected	Negative
78	F	38	NP swab+throat swab	Not detected	Negative
79	M	50	NP swab+throat swab	Not detected	Negative
80	F	83	NP swab+throat swab	Not detected	Negative
81	M	59	NP swab+throat swab	Not detected	Negative
82	F	61	NP swab+throat swab	Not detected	Negative
83	F	45	NP swab+throat swab	Not detected	Negative
84	F	61	NP swab+throat swab	Not detected	Positive (weakly)
85	M	55	NP swab+throat swab	Not detected	Negative
86	F	57	NP swab+throat swab	Not detected	Negative
87	F	68	NP swab+throat swab	Not detected	Negative
88	F	60	NP swab+throat swab	Not detected	Negative
89	M	71	NP swab+throat swab	Not detected	Negative
90	F	71	NP swab+throat swab	Not detected	Negative
91	F	71	NP swab+throat swab	Not detected	Negative
92	F	56	NP swab+throat swab	Not detected	Negative
93	F	57	NP swab+throat swab	Not detected	Negative
94	F	80	NP swab+throat swab	Not detected	Negative
95	M	70	NP swab+throat swab	Not detected	Negative
96	M	72	NP swab+throat swab	Not detected	Negative
97	M	89	NP swab+throat swab	Not detected	Negative
98	F	70	NP swab+throat swab	Not detected	Negative
99	F	58	NP swab+throat swab	Not detected	Negative
100	F	36	NP swab+throat swab	Not detected	Negative
101	F	16	NP swab+throat swab	Not detected	Negative
102	F	76	NP swab+throat swab	Not detected	Negative
103	M	70	NP swab+throat swab	Not detected	Negative
104	M	56	NP swab+throat swab	Not detected	Negative
105	F	49	NP swab+throat swab	Not detected	Negative
106	F	49	NP swab+throat swab	Not detected	Negative
107	F	46	NP swab+throat swab	Not detected	Negative
108	F	70	NP swab+throat swab	Not detected	Negative
109	M	51	NP swab+throat swab	Not detected	Negative
110	F	88	NP swab+throat swab	Not detected	Negative
111	M	70	NP swab+throat swab	Not detected	Negative
112	M	20	NP swab+throat swab	Not detected	Negative
113	F	40	NP swab+throat swab	Not detected	Negative
114	M	27	NP swab+throat swab	Not detected	Negative
115	M	64	NP swab+throat swab	Not detected	Negative
116	M	72	NP swab+throat swab	Not detected	Negative
117	M	55	NP swab+throat swab	Not detected	Negative
118	M	52	NP swab+throat swab	Not detected	Negative
119	F	48	NP swab+throat swab	Not detected	Negative
120	F	57	NP swab+throat swab	Not detected	Negative
121	F	67	NP swab+throat swab	Not detected	Negative
122	F	66	NP swab+throat swab	Not detected	Negative
123	F	57	NP swab+throat swab	Not detected	Negative
124	F	22	NP swab+throat swab	Not detected	Negative
125	F	42	NP swab+throat swab	Not detected	Negative
126	M	60	NP swab+throat swab	Not detected	Negative
127	F	65	NP swab+throat swab	Not detected	Negative
128	F	30	NP swab+throat swab	Not detected	Negative
129	M	26	NP swab+throat swab	Not detected	Negative
130	M	66	NP swab+throat swab	Not detected	Negative
131	F	22	NP swab+throat swab	Not detected	Negative
132	M	32	NP swab+throat swab	Not detected	Negative
133	M	23	NP swab+throat swab	Not detected	Negative
134	F	66	NP swab+throat swab	Not detected	Negative
135	F	76	Tracheal suction	Not detected	Negative
136	F	70	NP swab+throat swab	Not detected	Negative
137	F	73	NP swab+throat swab	Not detected	Negative
138	M	73	NP swab+throat swab	Not detected	Negative
139	M	75	NP swab+throat swab	Not detected	Negative
140	M	65	NP swab+throat swab	Not detected	Negative
141	F	79	NP swab+throat swab	Not detected	Negative
142	F	62	NP swab+throat swab	Not detected	Negative
143	M	50	NP swab+throat swab	Not detected	Negative
144	F	61	Sputum	Not detected	Negative
145	F	80	Tracheal suction	Not detected	Negative
146	F	56	NP swab+throat swab	Not detected	Negative
147	M	55	NP swab+throat swab	Not detected	Negative
148	F	65	NP swab+throat swab	Not detected	Negative
149	F	47	NP swab+throat swab	Not detected	Negative
150	F	71	NP swab+throat swab	Not detected	Negative
151	F	84	NP swab+throat swab	Not detected	Negative
152	F	71	NP swab+throat swab	Not detected	Negative
153	M	56	NP swab+throat swab	Not detected	Negative
154	F	81	NP swab+throat swab	Not detected	Negative
155	M	80	NP swab+throat swab	Not detected	Negative
156	M	74	NP swab+throat swab	Not detected	Negative
157	F	80	NP swab+throat swab	Not detected	Negative
158	F	42	NP swab+throat swab	Not detected	Negative
159	M	65	NP swab+throat swab	Not detected	Negative
160	F	48	NP swab+throat swab	Not detected	Negative
161	M	24	NP swab+throat swab	Not detected	Negative
162	F	42	NP swab+throat swab	Not detected	Negative
163	M	57	NP swab+throat swab	Not detected	Negative
164	F	83	NP swab+throat swab	Not detected	Positive (weakly)
165	F	69	NP swab+throat swab	Not detected	Negative
166	F	67	NP swab+throat swab	Not detected	Negative
167	M	79	NP swab+throat swab	Not detected	Negative
168	F	52	NP swab+throat swab	Not detected	Negative
169	F	74	NP swab+throat swab	Not detected	Negative
170	M	64	NP swab+throat swab	Not detected	Negative
171	F	72	NP swab+throat swab	Not detected	Negative
172	M	53	NP swab+throat swab	Not detected	Negative
173	F	64	NP swab+throat swab	Not detected	Negative
174	M	56	NP swab+throat swab	Not detected	Negative
175	M	75	NP swab+throat swab	Not detected	Negative
176	F	50	NP swab+throat swab	Not detected	Negative
177	M	41	NP swab+throat swab	Not detected	Negative
178	M	55	NP swab+throat swab	Not detected	Negative
179	M	23	NP swab+throat swab	Not detected	Negative
180	F	41	NP swab+throat swab	Not detected	Negative
181	F	86	NP swab+throat swab	Not detected	Negative
182	M	68	NP swab+throat swab	Not detected	Negative
183	F	82	NP swab+throat swab	Not detected	Negative
184	F	64	NP swab+throat swab	Not detected	Negative
185	F	68	NP swab+throat swab	Not detected	Negative
186	M	73	NP swab+throat swab	Not detected	Negative
187	M	69	NP swab+throat swab	Not detected	Negative
188	M	39	NP swab+throat swab	Not detected	Negative
189	M	53	NP swab+throat swab	Not detected	Negative
190	M	47	NP swab+throat swab	Not detected	Negative
191	M	30	NP swab+throat swab	Not detected	Negative
192	F	44	NP swab+throat swab	Not detected	Negative
193	F	87	NP swab+throat swab	Not detected	Negative
194	F	84	NP swab+throat swab	Not detected	Negative
195	M	80	NP swab+throat swab	Not detected	Negative
196	M	58	NP swab+throat swab	Not detected	Negative
197	M	74	NP swab+throat swab	Not detected	Negative
198	M	74	NP swab+throat swab	Not detected	Negative
199	F	57	NP swab+throat swab	Not detected	Negative
200	F	56	NP swab+throat swab	Not detected	Negative
201	M	40	NP swab+throat swab	Not detected	Negative
202	F	50	NP swab+throat swab	Not detected	Negative
203	F	63	NP swab+throat swab	Not detected	Negative
204	F	89	NP swab+throat swab	Not detected	Negative
205	M	74	NP swab+throat swab	Not detected	Negative
206	F	77	NP swab+throat swab	Not detected	Negative
207	F	58	NP swab+throat swab	Not detected	Negative
208	M	62	NP swab+throat swab	Not detected	Negative
209	F	62	NP swab+throat swab	Not detected	Negative
210	F	80	NP swab+throat swab	Not detected	Negative
211	F	65	NP swab+throat swab	Not detected	Negative
212	F	69	NP swab+throat swab	Not detected	Negative
213	M	82	NP swab+throat swab	Not detected	Negative
214	F	84	NP swab+throat swab	Not detected	Negative
215	M	63	NP swab+throat swab	Not detected	Negative
216	F	57	NP swab+throat swab	Not detected	Negative
217	F	79	NP swab+throat swab	Not detected	Negative
218	M	66	NP swab+throat swab	Not detected	Negative
219	M	60	NP swab+throat swab	Not detected	Negative
220	M	64	NP swab+throat swab	Not detected	Negative
221	M	73	NP swab+throat swab	Not detected	Negative
222	M	57	NP swab+throat swab	Not detected	Negative
223	F	69	NP swab+throat swab	Not detected	Negative
224	M	67	NP swab+throat swab	Not detected	Negative
225	F	62	NP swab+throat swab	Not detected	Negative
226	M	43	NP swab+throat swab	Not detected	Negative
227	F	47	NP swab+throat swab	Not detected	Negative
228	F	70	NP swab+throat swab	Not detected	Negative
229	M	64	NP swab+throat swab	Not detected	Negative
230	F	85	NP swab+throat swab	Not detected	Negative
231	M	70	NP swab+throat swab	Not detected	Negative
232	M	74	NP swab+throat swab	Not detected	Negative
233	F	41	NP swab+throat swab	Not detected	Negative
234	F	95	NP swab+throat swab	Not detected	Negative
235	M	68	NP swab+throat swab	Not detected	Negative
236	M	81	NP swab+throat swab	Not detected	Negative
237	M	73	NP swab+throat swab	Not detected	Negative
238	M	67	NP swab+throat swab	Not detected	Negative
239	F	62	NP swab+throat swab	Not detected	Negative
240	F	68	NP swab+throat swab	Not detected	Negative
241	M	66	NP swab+throat swab	Not detected	Negative
242	F	84	NP swab+throat swab	Not detected	Negative
243	F	52	NP swab+throat swab	Not detected	Negative
244	M	79	NP swab+throat swab	Not detected	Negative
245	M	16	NP swab+throat swab	Not detected	Negative
246	M	52	NP swab+throat swab	Not detected	Negative
247	F	79	NP swab+throat swab	Not detected	Negative
248	M	63	NP swab+throat swab	Not detected	Negative
249	F	61	NP swab+throat swab	Not detected	Negative
250	M	82	NP swab+throat swab	Not detected	Negative
251	M	76	NP swab+throat swab	Not detected	Negative
252	F	61	NP swab+throat swab	Not detected	Negative
253	F	62	NP swab+throat swab	Not detected	Negative
254	F	39	NP swab+throat swab	Not detected	Negative
255	M	29	NP swab+throat swab	Not detected	Negative
256	F	61	NP swab+throat swab	Not detected	Negative
257	F	32	NP swab+throat swab	Not detected	Negative
258	M	59	NP swab+throat swab	Not detected	Negative
259	M	71	NP swab+throat swab	Not detected	Negative
260	M	42	NP swab+throat swab	Not detected	Negative
261	F	67	NP swab+throat swab	Not detected	Negative
262	F	70	NP swab+throat swab	Not detected	Negative
263	F	81	NP swab+throat swab	Not detected	Negative
264	M	83	NP swab+throat swab	Not detected	Negative
265	F	81	NP swab+throat swab	Not detected	Negative
266	M	21	NP swab+throat swab	Not detected	Negative
267	F	71	NP swab+throat swab	Not detected	Negative
268	M	60	NP swab+throat swab	Not detected	Negative
269	M	43	NP swab+throat swab	Not detected	Negative
270	F	39	NP swab+throat swab	Not detected	Negative
271	F	55	NP swab+throat swab	Not detected	Negative
272	M	74	NP swab+throat swab	Not detected	Negative
273	F	84	NP swab+throat swab	Not detected	Negative
274	F	49	NP swab+throat swab	Not detected	Negative
275	M	66	NP swab+throat swab	Not detected	Negative
276	F	20	NP swab+throat swab	Not detected	Negative
277	F	33	NP swab+throat swab	Not detected	Negative
278	M	51	NP swab+throat swab	Not detected	Negative
279	F	45	NP swab+throat swab	Not detected	Negative
280	M	28	NP swab+throat swab	Not detected	Negative
281	F	57	NP swab+throat swab	Not detected	Negative
282	F	74	NP swab+throat swab	Not detected	Negative
283	F	39	NP swab+throat swab	Not detected	Negative
284	M	56	NP swab+throat swab	Not detected	Negative
285	F	64	NP swab+throat swab	Not detected	Positive (weakly)
286	F	60	NP swab+throat swab	Not detected	Negative
287	F	75	Tracheal suction	Not detected	Negative
288	M	68	NP swab+throat swab	Not detected	Negative
289	F	73	NP swab+throat swab	Not detected	Negative
290	F	66	NP swab+throat swab	Not detected	Negative
291	F	76	NP swab+throat swab	Not detected	Negative
292	M	46	NP swab+throat swab	Not detected	Negative
293	M	79	NP swab+throat swab	Not detected	Negative
294	F	40	NP swab+throat swab	Not detected	Negative
295	M	63	NP swab+throat swab	Not detected	Negative
296	F	59	NP swab+throat swab	Not detected	Negative
297	M	62	NP swab+throat swab	Not detected	Negative
298	F	54	NP swab+throat swab	Not detected	Negative
299	F	57	NP swab+throat swab	Not detected	Negative
300	F	60	NP swab+throat swab	Not detected	Negative
301	M	49	NP swab+throat swab	Not detected	Negative
302	F	77	NP swab+throat swab	Not detected	Negative
303	M	57	NP swab+throat swab	Not detected	Negative
304	M	57	NP swab+throat swab	Not detected	Negative
305	M	70	NP swab+throat swab	Not detected	Negative
306	M	58	NP swab+throat swab	Not detected	Negative
307	M	86	NP swab+throat swab	Not detected	Negative
308	M	68	NP swab+throat swab	Not detected	Negative
309	F	67	NP swab+throat swab	Not detected	Negative
310	F	84	NP swab+throat swab	Not detected	Negative
311	F	65	NP swab+throat swab	Not detected	Negative
312	M	77	NP swab+throat swab	Not detected	Negative
313	M	70	NP swab+throat swab	Not detected	Negative
314	M	62	NP swab+throat swab	Not detected	Negative
315	M	66	NP swab+throat swab	Not detected	Negative
316	F	49	NP swab+throat swab	Not detected	Negative
317	F	47	NP swab+throat swab	Not detected	Negative
318	F	40	NP swab+throat swab	Not detected	Negative
319	F	30	NP swab+throat swab	Not detected	Negative
320	F	54	NP swab+throat swab	Not detected	Negative
321	M	59	NP swab+throat swab	Not detected	Negative
322	F	54	NP swab+throat swab	Not detected	Negative
323	F	20	NP swab+throat swab	Not detected	Negative
324	F	30	NP swab+throat swab	Not detected	Negative
325	F	43	NP swab+throat swab	Not detected	Negative
326	F	62	NP swab+throat swab	Not detected	Negative
327	F	45	NP swab+throat swab	Not detected	Negative
328	F	51	NP swab+throat swab	Not detected	Negative
329	M	84	NP swab+throat swab	Not detected	Negative
330	M	29	NP swab+throat swab	Not detected	Negative
331	F	49	NP swab+throat swab	Not detected	Negative
332	M	56	NP swab+throat swab	Not detected	Negative
333	F	74	NP swab+throat swab	Not detected	Negative
334	M	51	NP swab+throat swab	Not detected	Negative
335	F	86	Sputum	Not detected	Negative
336	F	40	NP swab+throat swab	Not detected	Negative
337	M	78	NP swab+throat swab	Not detected	Negative
338	F	68	NP swab+throat swab	Not detected	Negative
339	M	32	NP swab+throat swab	Not detected	Negative
340	F	31	NP swab+throat swab	Not detected	Negative
341	F	65	NP swab+throat swab	Not detected	Negative
342	F	40	NP swab+throat swab	Not detected	Negative
343	F	86	NP swab+throat swab	Not detected	Negative
344	F	55	NP swab+throat swab	Not detected	Negative
345	M	67	NP swab+throat swab	Not detected	Negative
346	M	83	NP swab+throat swab	Not detected	Negative
347	M	70	NP swab+throat swab	Not detected	Negative
348	F	37	NP swab+throat swab	Not detected	Negative
349	F	75	NP swab+throat swab	Not detected	Negative
350	M	52	NP swab+throat swab	Not detected	Negative
351	M	47	NP swab+throat swab	Not detected	Negative
352	M	51	NP swab+throat swab	Not detected	Negative
353	M	18	NP swab+throat swab	Not detected	Negative
354	F	61	NP swab+throat swab	Not detected	Negative
355	F	62	NP swab+throat swab	Not detected	Negative
356	F	47	NP swab+throat swab	Not detected	Negative
357	F	43	NP swab+throat swab	Not detected	Negative
358	F	48	NP swab+throat swab	Not detected	Negative
359	F	50	NP swab+throat swab	Not detected	Negative
360	M	38	NP swab+throat swab	Not detected	Negative
361	F	35	NP swab+throat swab	Not detected	Negative
362	F	45	NP swab+throat swab	Not detected	Negative
363	F	63	NP swab+throat swab	Not detected	Negative
364	F	33	NP swab+throat swab	Not detected	Negative
365	F	46	NP swab+throat swab	Not detected	Negative
366	F	77	NP swab+throat swab	Not detected	Negative
367	F	45	NP swab+throat swab	Not detected	Negative
368	M	37	NP swab+throat swab	Not detected	Negative
369	F	50	NP swab+throat swab	Not detected	Negative
370	M	72	NP swab+throat swab	Not detected	Negative
371	F	81	NP swab+throat swab	Not detected	Negative
372	F	68	NP swab+throat swab	Not detected	Negative
373	F	72	NP swab+throat swab	Not detected	Negative
374	F	71	NP swab+throat swab	Not detected	Negative
375	F	75	NP swab+throat swab	Not detected	Negative
376	F	75	NP swab+throat swab	Not detected	Negative
377	F	75	NP swab+throat swab	Not detected	Negative
378	F	85	NP swab+throat swab	Not detected	Negative
379	M	89	NP swab+throat swab	Not detected	Negative
380	F	71	NP swab+throat swab	Not detected	Negative
381	M	55	NP swab+throat swab	Not detected	Negative
382	F	47	NP swab+throat swab	Not detected	Negative
383	F	82	NP swab+throat swab	Not detected	Negative
384	F	28	NP swab+throat swab	Not detected	Negative
385	M	55	NP swab+throat swab	Not detected	Negative
386	F	71	NP swab+throat swab	Not detected	Negative
387	M	24	NP swab+throat swab	Not detected	Negative
388	M	53	NP swab+throat swab	Not detected	Negative
389	M	32	NP swab+throat swab	Not detected	Negative
390	F	30	NP swab+throat swab	Not detected	Negative
391	M	67	NP swab+throat swab	Not detected	Negative
392	F	60	NP swab+throat swab	Not detected	Negative
393	F	54	NP swab+throat swab	Not detected	Negative
394	M	62	NP swab+throat swab	Not detected	Negative
		Age
	N	394
	Mean	59.401
	SD	16.4272
	Median	61
	min	16
	max	95
	Note: Rapid antigen test in case no.4, 27, 84, 164, 285 showed false-positive results.
